# Supplementary material for: MaOpy2, a Transmembrane Protein, Is Involved in Stress Tolerances and Pathogenicity and Negatively Regulates Conidial Yield by Shifting the Conidiation Pattern in Metarhizium acridum
Source: MDPI journal article supplement (doi:10.3390/jof8060587), 2022-05-30
Supplement: s1 [file s1]

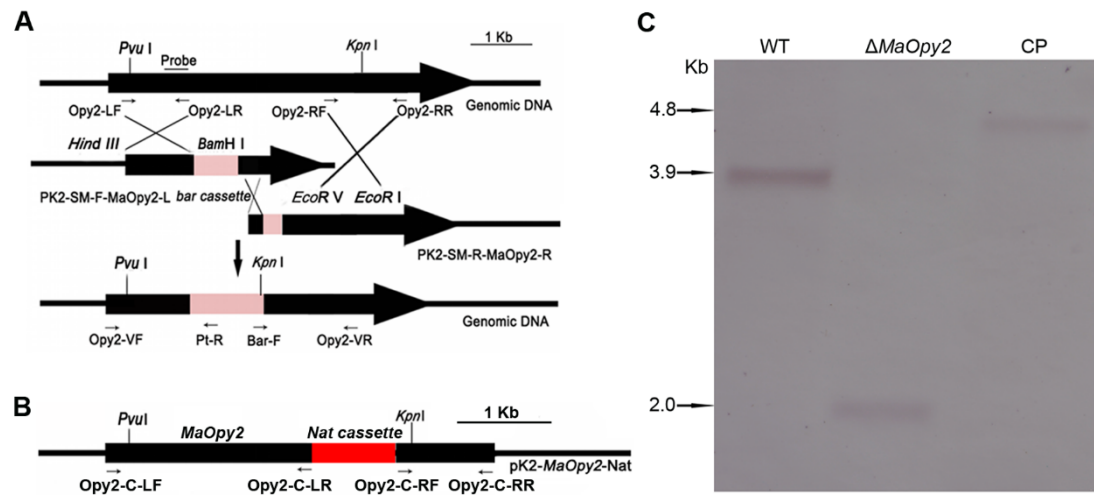

**Figure S1. Disruption and complementation of *MaOpy2*.**

(A) Schematic illustration of *MaOpy2* disruption. (B) Design of the *MaOpy2* complementation vector. (C) Southern blotting. Genomic DNA from WT,  $\Delta MaOpy2$  and CP were digested with *Pvu* I and *Kpn* I. WT: wild type;  $\Delta MaOpy2$ : the *MaOpy2* disruption mutant; CP: complemented mutant.

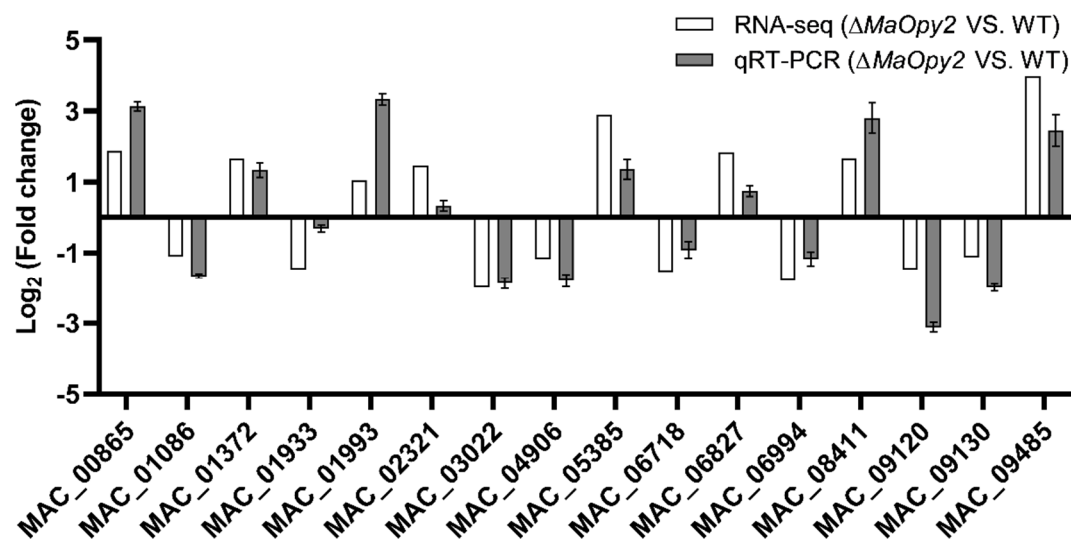

**Figure S2. Validation of the RNA-seq data by qRT-PCR.**
