# Supplementary material for: MaOpy2, a Transmembrane Protein, Is Involved in Stress Tolerances and Pathogenicity and Negatively Regulates Conidial Yield by Shifting the Conidiation Pattern in Metarhizium acridum
Source: MDPI journal article supplement (doi:10.3390/jof8060587), 2022-05-30
Supplement: s1 [file s1]

Table S3 DEGs involved in stress tolerance and conidiation pattern shift.

| Gene ID   | log2 ( $\Delta MaOpy2$ /WT) | Q value ( $\Delta MaOpy2$ /WT) | Description                                 | Reference  |
|-----------|-----------------------------|--------------------------------|---------------------------------------------|------------|
| MAC_00865 | 1.871183843                 | 8.54E-13                       | serine/threonine-protein kinase GIN4        | [27,34–36] |
| MAC_01372 | 1.659528474                 | 1.33E-18                       | Glycosyl hydrolase family 16 protein        | [26]       |
| MAC_04906 | -1.18489314                 | 0.00882945                     | cell wall glycosyl hydrolase Dfg5, putative | [26]       |
| MAC_06827 | 1.832997724                 | 0.005786526                    | pantothenate transporter                    | [33]       |
